# Supplementary material
Source: HighWire-hosted journal article supplement (https://erj.ersjournals.com/content/52/4/1800437)
Supplement: inline-supplementary-material-2 [file inline-supplementary-material-2.pdf]

**Table E1. Subject characteristics (n=39)**

|                                                     | <b>AR</b>         | <b>R</b>           | <b>C</b>         | <b>p-value</b>   |
|-----------------------------------------------------|-------------------|--------------------|------------------|------------------|
| <b>Sample size</b>                                  | 12                | 14                 | 13               |                  |
| <b>Age, years</b>                                   | 22 (21;23)        | 24.5(21.25;28.75)  | 30(25;36)        | <b>0.001</b>     |
| <b>Sex ratio (M/F)</b>                              | 9/3               | 9/5                | 4/9              | 0.07             |
| <b>PAREO score</b>                                  | 7(5;8.25)         | 7(6;8)             | na               | 0.896            |
| <b>SNOT-22 score</b>                                | 29(19.5;35.5)     | 26(22;37.25)       | na               | 0.926            |
| <b>Number of sensitizations</b>                     | 5(3.75;6.25)      | 3(2;6)             | 0                | <b>&lt;0.001</b> |
| <b>Dust mite sensitization (n)</b>                  | 9                 | 12                 | 0                | <b>&lt;0.001</b> |
| <b>Intermittent/ persistent rhinitis</b>            | 4/8               | 2/12               | na               |                  |
| <b>Mild/ moderate-severe rhinitis</b>               | 3/9               | 4/10               | na               |                  |
| <b>Rhinitis duration (years)</b>                    | 14.48(6.1; 16.04) | 12.55(6.4; 15.19)  | na               | 0.724            |
| <b>Partly controlled/ controlled asthma</b>         | 2/10              | na                 | na               | na               |
| <b>FEV1, % predicted</b>                            | 96.3(89.7;103.3)  | 106.6(102.7;114.6) | 98.9(96.2;109.5) | <b>0.023</b>     |
| <b>FEF<sub>25-75</sub>, % predicted</b>             | 75.2(63.3;81.7)   | 104.3(90.7;116.6)  | 82.8(81.4;96.2)  | <b>0.004</b>     |
| <b>Asthma duration (years)</b>                      | 8.79(2.87; 14.68) | na                 | na               | na               |
| <b>Nasal cell count (x10<sup>5</sup> cells)</b>     | 9.5(7.25;12)      | 8.6(6.8;13)        | 8(6 ;16)         | 0.987            |
| <b>Nasal epithelial cells (%)</b>                   | 78.8(59;92)       | 85.6(78.2;89.4)    | 95.6(72.8;98.3)  | 0.053            |
| <b>Nasal mast cells (%)</b>                         | 0.13(0.09;0.26)   | 0.15(0.05;0.19)    | 0.01(0.01;0.04)  | <b>0.002</b>     |
| <b>Nasal eosinophils (%)</b>                        | 0.06(0.04;0.27)   | 0.25(0.09;0.51)    | 0.01(0;0.07)     | <b>0.002</b>     |
| <b>Nasal T-cells (%)</b>                            | 1(0.5;1.7)        | 1.2(0.8;2.3)       | 0.4(0.3;0.8)     | 0.135            |
| <b>Nasal B-cells (%)</b>                            | 0(0;0.1)          | 0.1(0;0.1)         | 0(0;0)           | 0.224            |
| <b>Nasal PMN (%)</b>                                | 7.7(2.4;30.1)     | 6.4(2.9;12.9)      | 0.6(0.2;10.5)    | 0.107            |
| <b>Bronchial cell count (x10<sup>5</sup> cells)</b> | 9.5(7.25;13.8)    | 15(9.4;21)         | 12(8 ;17)        | 0.229            |
| <b>Bronchial epithelial cells (%)</b>               | 92.8(89.3;95.8)   | 92.5(88.3;94.3)    | 93.7(90.8;95.4)  | 0.484            |
| <b>Bronchial mast cells (%)</b>                     | 1.06(0.6 ;1.23)   | 0.4(0.29;0.58)     | 0.08(0.05;0.31)  | <b>0.001</b>     |
| <b>Bronchial eosinophils (%)</b>                    | 0.02(0.01;0.04)   | 0.07(0.03;0.1)     | 0.02(0.01;0.03)  | 0.064            |
| <b>Bronchial T-cells (%)</b>                        | 1.77(1.13;2.3)    | 1.93(1.53;2.91)    | 1.65(1.49;2.47)  | 0.824            |
| <b>Bronchial B-cells (%)</b>                        | 0.03(0.01 ;0.04)  | 0.03(0.0 ;0.15)    | 0.03(0.03;0.07)  | 0.347            |
| <b>Bronchial PMN (%)</b>                            | 0.47(0.2;0.73)    | 0.97(0.35;1.86)    | 1.98(0.7;2.17)   | <b>0.025</b>     |
