# Supplementary material
Source: HighWire-hosted journal article supplement (https://erj.ersjournals.com/content/52/4/1800437)
Supplement: inline-supplementary-material-3 [file inline-supplementary-material-3.pdf]

**Table E2. Comparison of nasal and bronchial cells within groups (n=39).**

|                                           | <b>AR</b>       |                  |                | <b>R</b>        |                  |                | <b>C</b>        |                  |                |
|-------------------------------------------|-----------------|------------------|----------------|-----------------|------------------|----------------|-----------------|------------------|----------------|
|                                           | <b>Nasal</b>    | <b>Bronchial</b> | <b>p-value</b> | <b>Nasal</b>    | <b>Bronchial</b> | <b>p-value</b> | <b>Nasal</b>    | <b>Bronchial</b> | <b>p-value</b> |
| <b>Cell count (x10<sup>5</sup> cells)</b> | 9.5(7.25;12)    | 9.5(7.25;13.8)   | 0.91           | 8.6(6.8;13)     | 15(9.4;21)       | 0.058          | 8(6 ;16)        | 12(8 ;17)        | 0.488          |
| <b>Epithelial cells( %)</b>               | 78.8(59;92)     | 92.8(89.3;95.8)  | <b>0.007</b>   | 85.6(78.2;89.4) | 92.5(88.3;94.3)  | <b>0.011</b>   | 95.6(72.8;98.3) | 93.7(90.8;95.4)  | 0.65           |
| <b>Mast cells (%)</b>                     | 0.13(0.09;0.26) | 1.06(0.6 ;1.23)  | <b>0</b>       | 0.15(0.05;0.19) | 0.4(0.29;0.58)   | <b>0.004</b>   | 0.01(0.01;0.04) | 0.08(0.05;0.31)  | <b>0.003</b>   |
| <b>Eosinophils (%)</b>                    | 0.06(0.04;0.27) | 0.02(0.01;0.04)  | <b>0.024</b>   | 0.25(0.09;0.51) | 0.07(0.03;0.1)   | <b>0.004</b>   | 0.01(0;0.07)    | 0.02(0.01;0.03)  | 0.878          |
| <b>T-cells (%)</b>                        | 1(0.5;1.7)      | 1.77(1.13;2.3)   | 0.198          | 1.2(0.8;2.3)    | 1.93(1.53;2.91)  | 0.21           | 0.4(0.3;0.8)    | 1.65(1.49;2.47)  | <b>0.001</b>   |
| <b>B-cells (%)</b>                        | 0(0;0.1)        | 0.03(0.01 ;0.04) | 0.198          | 0.1(0;0.1)      | 0.03(0.0 ;0.15)  | 0.874          | 0(0;0)          | 0.03(0.03;0.07)  | 0.081          |
| <b>PMN (%)</b>                            | 7.7(2.4;30.1)   | 0.47(0.2;0.73)   | <b>0</b>       | 6.4(2.9;12.9)   | 0.97(0.35;1.86)  | <b>0.002</b>   | 0.6(0.2;10.5)   | 1.98(0.7;2.17)   | 0.614          |
