# Supplementary material
Source: HighWire-hosted journal article supplement (https://erj.ersjournals.com/content/52/4/1800437)
Supplement: inline-supplementary-material-4 [file inline-supplementary-material-4.pdf]

**Table E3. Comparison between included (n=26) and excluded (n=13) subject characteristics.**

|                                                         | <b>AR</b>           | <b>R</b>              | <b>C</b>            | <b>AR excluded</b>    | <b>R excluded</b>      | <b>C excluded</b>     | <b>AR vs AR<br/>excluded<br/>p-value</b> | <b>R vs R<br/>excluded<br/>p-value</b> | <b>C vs C<br/>excluded<br/>p-value</b> |
|---------------------------------------------------------|---------------------|-----------------------|---------------------|-----------------------|------------------------|-----------------------|------------------------------------------|----------------------------------------|----------------------------------------|
| <b>Sample size</b>                                      | 7                   | 10                    | 9                   | 5                     | 4                      | 4                     |                                          |                                        |                                        |
| <b>Age, years</b>                                       | 22(21;24)           | 26(22.5;28.75)        | 29(25;36)           | 22 (21;22)            | 22<br>(20.75;26.25)    | 32.5 (30;36)          | 0.51                                     | 0.48                                   | 0.44                                   |
| <b>Sex ratio (M/F)</b>                                  | 5/2                 | 7/3                   | 2/7                 | 4 / 1                 | 2 / 2                  | 2 / 2                 | 1                                        | 0.58                                   | 0.53                                   |
| <b>PAREO score</b>                                      | 8(6.5;8.5)          | 7(6.25;8)             | na                  | 5 (4;7)               | 6 (5.5;6.5)            | na                    | 0.22                                     | 0.32                                   | na                                     |
| <b>SNOT-22 score</b>                                    | 32(22;47)           | 26(22;35.75)          | na                  | 25<br>(18.25;29.75)   | 30 (23.75;38)          | na                    | 0.34                                     | 0.80                                   | na                                     |
| <b>Number of<br/>sensitizations</b>                     | 5(4.5;6.5)          | 3(2;5.25)             | 0                   | 4 (3;6)               | 4 (2;6)                | 0 (0;0)               | 0.46                                     | 0.94                                   | 0.39                                   |
| <b>Dust mite<br/>sensitization (n)</b>                  | 5                   | 8                     | 0                   | 4                     | 4                      | 0                     | 1.00                                     | 1.00                                   | na                                     |
| <b>Intermittent/<br/>persistent<br/>rhinitis</b>        | 1/6                 | 2/8                   | na                  | 3 / 2                 | 0 / 4                  | na                    | 0.22                                     | 1.00                                   | na                                     |
| <b>Mild/moderate-<br/>severe<br/>Rhinitis</b>           | 1/6                 | 3/7                   | na                  | 2 / 3                 | 1 / 3                  | na                    | 0.53                                     | 1.00                                   | na                                     |
| <b>Rhinitis<br/>duration (y)</b>                        | 6.4(3.98;18.64)     | 14.47(6.43;<br>15.46) | na                  | 14.55<br>(14.4;15.55) | 6.73 (5.61;9.64)       | na                    | 0.53                                     | 0.47                                   | na                                     |
| <b>Partly<br/>controlled/<br/>controlled<br/>asthma</b> | 2/5                 | na                    | na                  | 0 / 5                 | na                     | na                    | 0.47                                     | na                                     | na                                     |
| <b>FEV1, %<br/>predicted</b>                            | 91.4(86.8;9<br>7.1) | 100.1(96.6;103.<br>2) | 96.8(93.4;98.7)     | 91.6 (84;95.95)       | 108.3<br>(105.4;112.2) | 103.7<br>(99.1;109.8) | 0.11                                     | 0.64                                   | 0.33                                   |
| <b>FEF<sub>25-75</sub>, %<br/>predicted</b>             | 74(69.4;89.4)       | 105.3(89;116.6)       | 92.1(81.4;96<br>.2) | 76.4 (49;80.6)        | 100.9(94.3;113)        | 82.5 (78.;88.4)       | 0.42                                     | 0.95                                   | 0.71                                   |
| <b>Asthma</b>                                           | 2.98(1.98;11.84)    | na                    | na                  | 14.47(11.6;15.2)      | na                     | na                    | 0.39                                     | na                                     | na                                     |

|                                                     |                 |                 |                 |                        |                       |                       |             |             |             |
|-----------------------------------------------------|-----------------|-----------------|-----------------|------------------------|-----------------------|-----------------------|-------------|-------------|-------------|
| <b>duration (y)</b>                                 | )               |                 |                 | 9)                     |                       |                       |             |             |             |
| <b>Nasal cell count (x10<sup>5</sup> cells)</b>     | 7.5(6.85;9.5)   | 8.6(6.8;12)     | 7.2(5;8)        | 12(11.25;12.05)        | 11.8 (6.6;17.45)      | 19.9(13.5;26.1)       | 0.17        | 0.49        | 0.10        |
| <b>Nasal epithelial cells (%)</b>                   | 91.5(80.1;93.5) | 86.9(85.5;91.7) | 98(95.6;98.8)   | 57.7 (56.9;59.4)       | 55.4 (46.3;64.5)      | 66.1 (60.4;71.1)      | <b>0.00</b> | <b>0.00</b> | <b>0.00</b> |
| <b>Nasal mastocytes (%)</b>                         | 0.14(0.11;0.33) | 0.15(0.05;0.24) | 0.01(0.01;0.04) | 0.12 (0.07;0.25)       | 0.13 (0.08;0.16)      | 0.02 (0.01;0.03)      | 0.43        | 0.45        | 0.94        |
| <b>Nasal eosinophils (%)</b>                        | 0.04(0.03;0.10) | 0.21(0.07;0.77) | 0.01(0;0.04)    | 0.14 (0.07;0.59)       | 0.25 (0.23;0.33)      | 0.13 (0.04;0.23)      | 0.15        | 0.84        | 0.11        |
| <b>Nasal LT (%)</b>                                 | 0.93(0.67;2.18) | 1.73(0.88;2.5)  | 0.35(0.29;0.68) | 1.09 (0.57;1.21)       | 0.91 (0.61;1.37)      | 0.81 (0.49;2.52)      | 0.64        | 0.45        | 0.15        |
| <b>Nasal LB (%)</b>                                 | 0.05(0.01;0.38) | 0.03(0.01;0.06) | 0.01(0;0.03)    | 0.04 (0.03;0.09)       | 0.71 (0.11;2.26)      | 0.08 (0.01;2.06)      | 1.00        | 0.24        | 0.15        |
| <b>Nasal PMN (%)</b>                                | 2.66(1.09;3.56) | 4.14(1.48;6.53) | 0.22(0.09;0.58) | 37.71<br>(27.61;37.74) | 35.56<br>(29.8;42.82) | 26.3<br>(15.83;34.34) | <b>0.00</b> | <b>0.00</b> | <b>0.01</b> |
| <b>Bronchial cell count (x10<sup>5</sup> cells)</b> | 9.5(8.25;10.15) | 15(9;21)        | 13(8;17)        | 11(62.5;15)            | 13.4(9.7;21)          | 10.1(6.65;15.75)      | 0.92        | 0.70        | 0.71        |
| <b>Bronchial epithelial cells (%)</b>               | 94.3(90.3;94.9) | 92.5(88.3;94.3) | 94.2(92.7;95.9) | 89.9 (88.8;95)         | 92.8 (88.4;94.6)      | 91.4 (89.1;92.9)      | 0.64        | 0.95        | 0.05        |
| <b>Bronchial mastocytes (%)</b>                     | 0.86(0.52;1.13) | 0.39(0.29;0.46) | 0.07(0.04;0.08) | 1.13 (1.08;1.24)       | 0.5 (0.3;0.64)        | 0.3 (0.19;0.68)       | 0.43        | 0.95        | 0.05        |
| <b>Bronchial eosinophils (%)</b>                    | 0.02(0.01;0.03) | 0.07(0.03;0.09) | 0.02(0.01;0.03) | 0.01 (0.01;0.06)       | 0.06 (0.01;0.11)      | 0.01 (0;0.03)         | 0.88        | 0.73        | 0.71        |
| <b>Bronchial LT (%)</b>                             | 1.8(1.12;2.59)  | 1.93(1.53;2.91) | 1.59(0.82;1.65) | 1.75 (1.31;1.98)       | 1.87 (1.41;2.65)      | 3.29 (2.86;4.63)      | 1.00        | 0.95        | <b>0.01</b> |
| <b>Bronchial LB (%)</b>                             | 0.03(0.01;0.04) | 0.04(0.01;0.15) | 0.05(0.02;0.07) | 0.03 (0.02;0.04)       | 0.03 (0.02;2.86)      | 0.03 (0.03;0.14)      | 1.00        | 0.84        | 1.00        |
| <b>Bronchial PMN (%)</b>                            | 0.43(0.19;0.64) | 1.25(0.3;2.39)  | 1.98(0.68;2.03) | 0.51 (0.31;0.9)        | 0.97 (0.8;1.06)       | 1.49 (0.78;2.25)      | 0.76        | 0.95        | 0.60        |
