# Supplementary material
Source: HighWire-hosted journal article supplement (https://erj.ersjournals.com/content/52/4/1800437)
Supplement: inline-supplementary-material-5 [file inline-supplementary-material-5.pdf]

**Table E4. 63 Most-regulated genes between nasal and bronchial cells in healthy subjects (C)**

| <b>Symbol</b>         | <b>Name</b>                                            | <b>logFC(C)</b> | <b>AveExpr(C)</b> | <b>adj.P.Val(C)</b> |
|-----------------------|--------------------------------------------------------|-----------------|-------------------|---------------------|
| <b>OTX2</b>           | orthodenticle homeobox 2                               | 8.01            | 0.09              | 2.49E-19            |
| <b>RP11-89K21.1</b>   | /                                                      | 7.6             | 1.13              | 4.88E-14            |
| <b>LGI1</b>           | leucine rich glioma inactivated 1                      | 7.44            | 0.54              | 1.01E-13            |
| <b>PAX6</b>           | paired box 6                                           | 7.37            | 0.03              | 9.17E-18            |
| <b>LINC00461</b>      | long intergenic non-protein coding RNA 461             | 6.78            | -0.99             | 1.14E-14            |
| <b>FEZF1</b>          | FEZ family zinc finger 1                               | 6.28            | -0.33             | 3.03E-14            |
| <b>PAX3</b>           | paired box 3                                           | 6.18            | -0.22             | 2.45E-14            |
| <b>PAX7</b>           | paired box 7                                           | 6.07            | 2.9               | 1.08E-15            |
| <b>SIX3-AS1</b>       | SIX3 antisense RNA 1                                   | 6.02            | -1.05             | 7.49E-15            |
| <b>RP11-966I7.1</b>   | /                                                      | 5.94            | -1.62             | 2.17E-18            |
| <b>IL19</b>           | interleukin 19                                         | 5.36            | 0.17              | 3.28E-09            |
| <b>ALOX15B</b>        | arachidonate 15-lipoxygenase, type B                   | 5.29            | -0.12             | 1.82E-11            |
| <b>GAPDHP24</b>       | glyceraldehyde 3 phosphate dehydrogenase pseudogene 24 | 5.28            | -1.21             | 5.01E-10            |
| <b>CA12</b>           | carbonic anhydrase 12                                  | 5.26            | 4.38              | 6.01E-17            |
| <b>GALNT13</b>        | polypeptide N-acetylgalactosaminyltransferase 13       | 5.25            | 0.83              | 2.59E-10            |
| <b>CPA4</b>           | carboxypeptidase A4                                    | 5.13            | 0.99              | 1.75E-06            |
| <b>RP11-10H3.1</b>    | /                                                      | 5.08            | -0.72             | 1.94E-07            |
| <b>RP5-964N17.1</b>   | /                                                      | 5.03            | -1.86             | 1.43E-12            |
| <b>FEZF1-AS1</b>      | FEZF1 antisense RNA 1                                  | 4.62            | 1.81              | 5.93E-15            |
| <b>MEOX1</b>          | mesenchyme homeobox 1                                  | 4.5             | -1.19             | 8.53E-10            |
| <b>LAMB4</b>          | laminin subunit beta 4                                 | 4.12            | 0.18              | 1.96E-10            |
| <b>EDN2</b>           | endothelin 2                                           | 4.08            | -1.53             | 2.12E-05            |
| <b>KRT24</b>          | keratin 24                                             | 4.07            | -1.42             | 5.82E-05            |
| <b>STC1</b>           | stanniocalcin 1                                        | 4.06            | 0.22              | 3.19E-07            |
| <b>RP11-1016B18.1</b> | /                                                      | -4.32           | -1.01             | 2.18E-08            |
| <b>SHH</b>            | sonic hedgehog                                         | -4.4            | 0.14              | 3.17E-09            |
| <b>CACNA1H</b>        | calcium voltage-gated channel subunit alpha1 H         | -4.46           | 0.6               | 7.09E-07            |
| <b>VSIG4</b>          | V-set and immunoglobulin domain containing 4           | -4.69           | 0.89              | 3.68E-08            |
| <b>RBP4</b>           | retinol binding protein 4                              | -5.02           | -2.46             | 1.35E-06            |
| <b>RP11-625L16.1</b>  | /                                                      | -5.14           | 0.07              | 1.52E-08            |
| <b>SCN3A</b>          | sodium voltage-gated channel alpha subunit 3           | -5.22           | -0.57             | 3.49E-08            |

|                      |                                                      |       |       |          |
|----------------------|------------------------------------------------------|-------|-------|----------|
| <b>LINC01014</b>     | long intergenic non-protein coding RNA 1014          | -5.31 | 0.1   | 2.30E-10 |
| <b>PRDM16</b>        | PR/SET domain 16                                     | -5.79 | 0.31  | 1.47E-16 |
| <b>CTD-3012A18.1</b> | /                                                    | -6.25 | -1.67 | 2.73E-20 |
| <b>RP11-368I23.2</b> | /                                                    | -6.32 | -0.64 | 1.52E-10 |
| <b>KIF1A</b>         | kinesin family member 1A                             | -6.42 | -1.2  | 3.78E-13 |
| <b>RP11-429A20.3</b> |                                                      | -6.55 | -2.08 | 9.84E-15 |
| <b>SCGB3A1</b>       | secretoglobin family 3A member 1                     | -6.56 | 6.6   | 1.62E-09 |
| <b>LMO3</b>          | LIM domain only 3                                    | -6.58 | 1.94  | 1.01E-17 |
| <b>RP11-429A20.4</b> | /                                                    | -6.59 | -1.84 | 1.43E-15 |
| <b>PAX1</b>          | paired box 1                                         | -6.72 | -1.93 | 2.26E-20 |
| <b>EGFEM1P</b>       | EGF like and EMI domain containing 1, pseudogene     | -6.84 | 2.78  | 2.04E-08 |
| <b>RP11-627G23.1</b> | /                                                    | -7.1  | 0.28  | 3.16E-14 |
| <b>SLC5A7</b>        | solute carrier family 5 member 7                     | -7.14 | -1.13 | 1.09E-17 |
| <b>NKX2-1</b>        | NK2 homeobox 1                                       | -8.59 | -0.79 | 3.03E-35 |
| <b>KCNA1</b>         | potassium voltage-gated channel subfamily A member 1 | -8.88 | 0.91  | 1.80E-16 |
| <b>FABP4</b>         | fatty acid binding prot                              | -8.9  | -0.66 | 1.08E-15 |
